# Supplementary material for: Thermal dynamics of lithium salt mixtures of ionic liquid in water by PGSE NMR spectroscopy
Source: Royal Society of Chemistry journal article supplement (doi:10.1039/c6ra00891g), 2016-01-01

**SUPPORTING INFORMATION**

**Thermal dynamics of the lithium salt mixtures of ionic liquid in water by PGSE NMR  
spectroscopy**

Raju Nanda\*

School of Chemical Sciences, National Institute of Science Education and Research,  
Bhubaneswar-751005, India

Email: [r.nanda@niser.ac.in](mailto:r.nanda@niser.ac.in), [nanda.raju85@gmail.com](mailto:nanda.raju85@gmail.com)

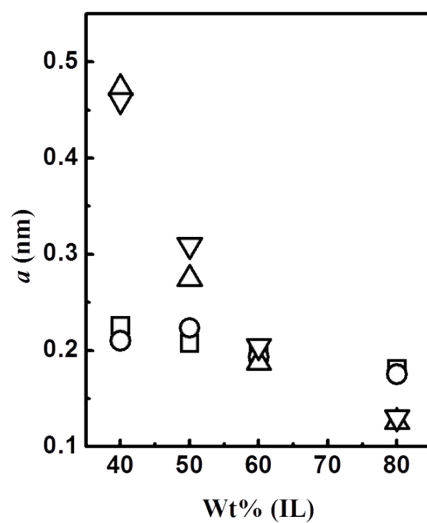

**Fig. S1** The values of van der Waals radii (SE radii/hydrodynamic radii) are calculated from the SE equation. The symbols represents for the [BMIM]Br in 1.0 mol kg<sup>-1</sup> of aqueous LiCl (□) and LiClO<sub>4</sub> (○), and [OMIM]Br in 1.0 mol kg<sup>-1</sup> of aqueous LiCl (△) and LiClO<sub>4</sub> (▽), respectively. The temperature of the medium in all the cases is kept constant as 300 K.

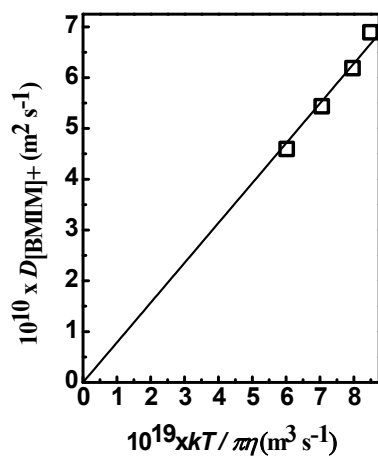

**Fig. S2** Stokes-Einstein (SE) plot for the  $D_{[BMIM]^+}$  in the aqueous solutions of [BMIM]Br (40 % w/w). The line is of the linear fit with the correlation coefficient ( $r^2$ ) value of 0.999.

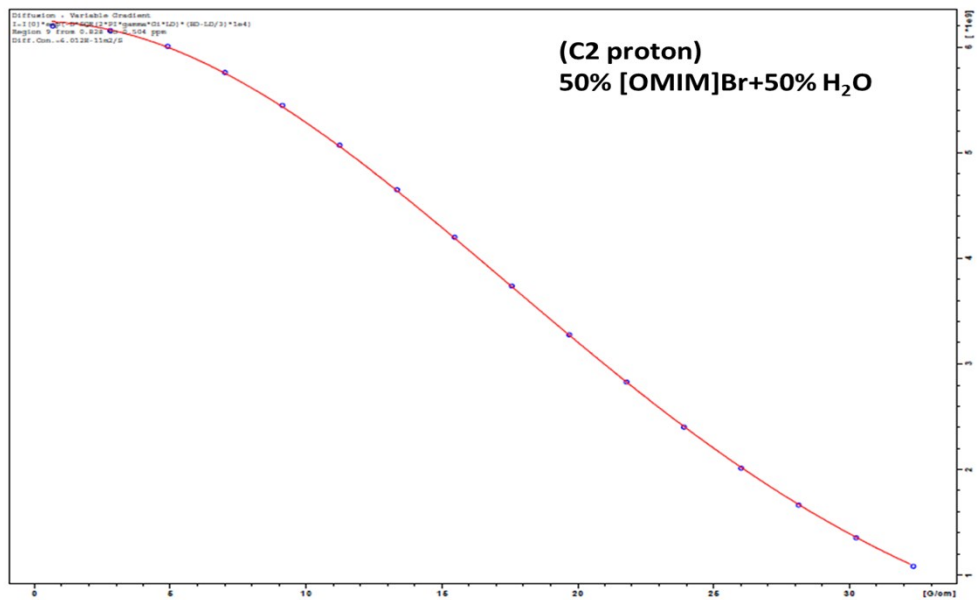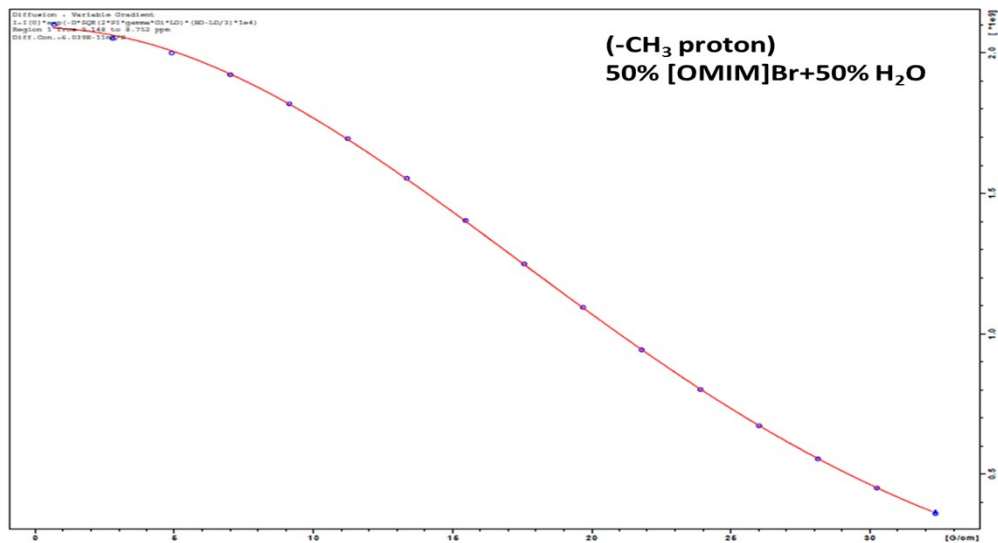

**Fig. S3** The plot of intensity versus gradient strength for the C2 (top) and -CH<sub>3</sub> proton (bottom) in its 50 wt% of [OMIM]Br in water at 300 K.

**Table S1.** The Stokes Einstein coefficient ( $c$ ) values for the H<sub>2</sub>O molecules in its liquid-H<sub>2</sub>O-Li<sup>+</sup> salt mixtures.

| Ionic liquid        | $m/\text{salt}$ (w/w %)   | $m$ (1/ $ca$ )/m <sup>-1</sup> | $ca/\text{nm}$ | $c$ (H <sub>2</sub> O) |
|---------------------|---------------------------|--------------------------------|----------------|------------------------|
| [BMIM]Br (40 % w/w) | 60 % w/w                  |                                |                |                        |
|                     | H <sub>2</sub> O          | $2.40 \times 10^9$             | 0.42           | 1.48                   |
|                     | 0.5 (LiCl)                | $2.07 \times 10^9$             | 0.48           | 1.71                   |
|                     | 0.5 (LiClO <sub>4</sub> ) | $2.50 \times 10^9$             | 0.41           | 1.45                   |
| [OMIM]Br (50 % w/w) | 50 % w/w                  |                                |                |                        |
|                     | H <sub>2</sub> O          | $1.03 \times 10^{10}$          | 0.10           | 0.35                   |
|                     | 0.5 (LiCl)                | $1.01 \times 10^{10}$          | 0.10           | 0.35                   |
|                     | 0.5 (LiClO <sub>4</sub> ) | $8.98 \times 10^9$             | 0.11           | 0.39                   |

**Table S2.** The calculated size of hole of [IL]<sup>+</sup> in its ionic liquid-H<sub>2</sub>O-Li<sup>+</sup> salt mixtures.

| System<br>(in H <sub>2</sub> O) | <i>T</i> /K | $D_{[\text{IL}]^+} \times 10^{10} / \text{m}^2 \text{ s}^{-1}$ | $\eta / \text{mPa.s}$ | $\xi / \text{pm}$ |
|---------------------------------|-------------|----------------------------------------------------------------|-----------------------|-------------------|
| [BMIM]Br (50% w/w)              | 300         | 3.535                                                          | 2.97                  | 209               |
|                                 | 305         | 4.271                                                          | 2.57                  | 203               |
|                                 | 310         | 4.934                                                          | 2.26                  | 203               |
|                                 | 315         | 5.273                                                          | 2.05                  | 213               |
| [OMIM]Br (50% w/w)              | 300         | 0.727                                                          | 11.10                 | 271               |
|                                 | 305         | 0.861                                                          | 9.33                  | 277               |
|                                 | 310         | 1.134                                                          | 8.48                  | 235               |
|                                 | 315         | 1.267                                                          | 7.68                  | 236               |

# $^1\text{H}$ NMR spectra of lithium salt mixtures of ionic liquids

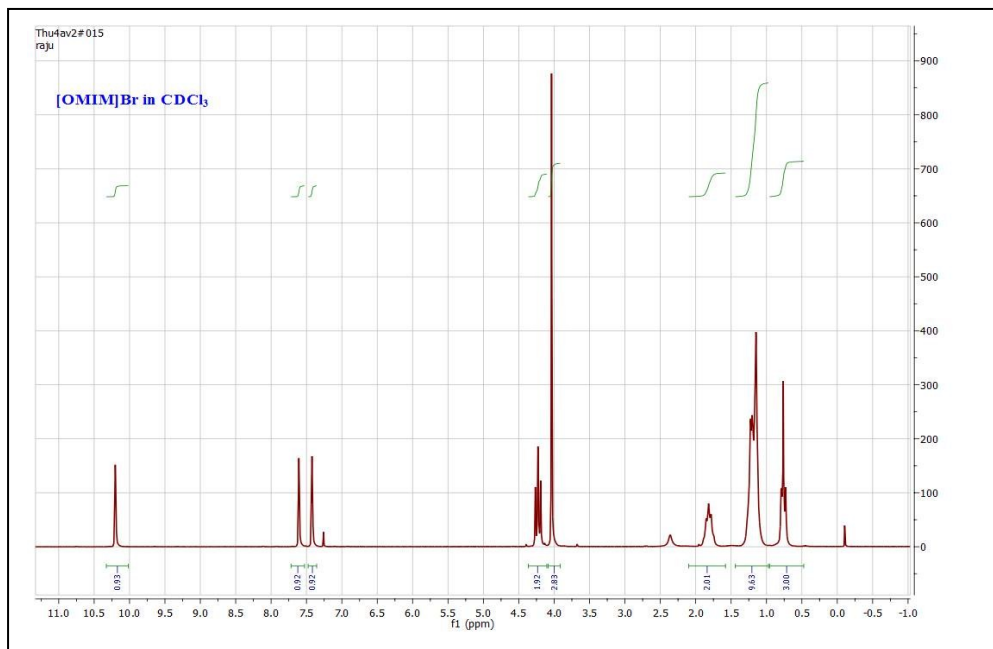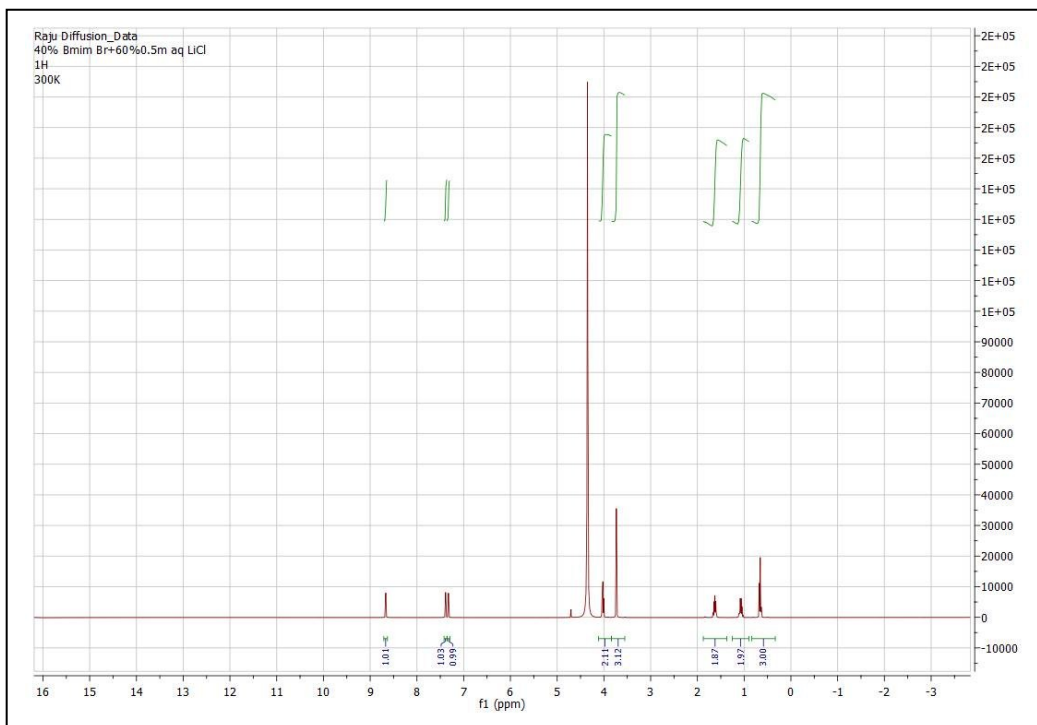

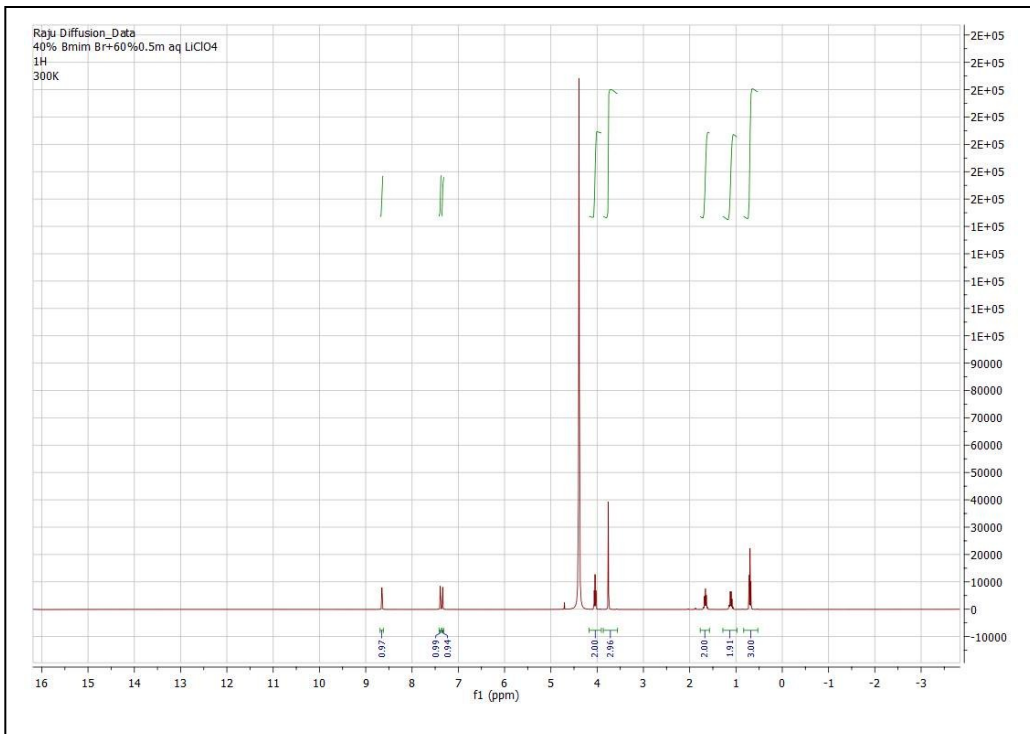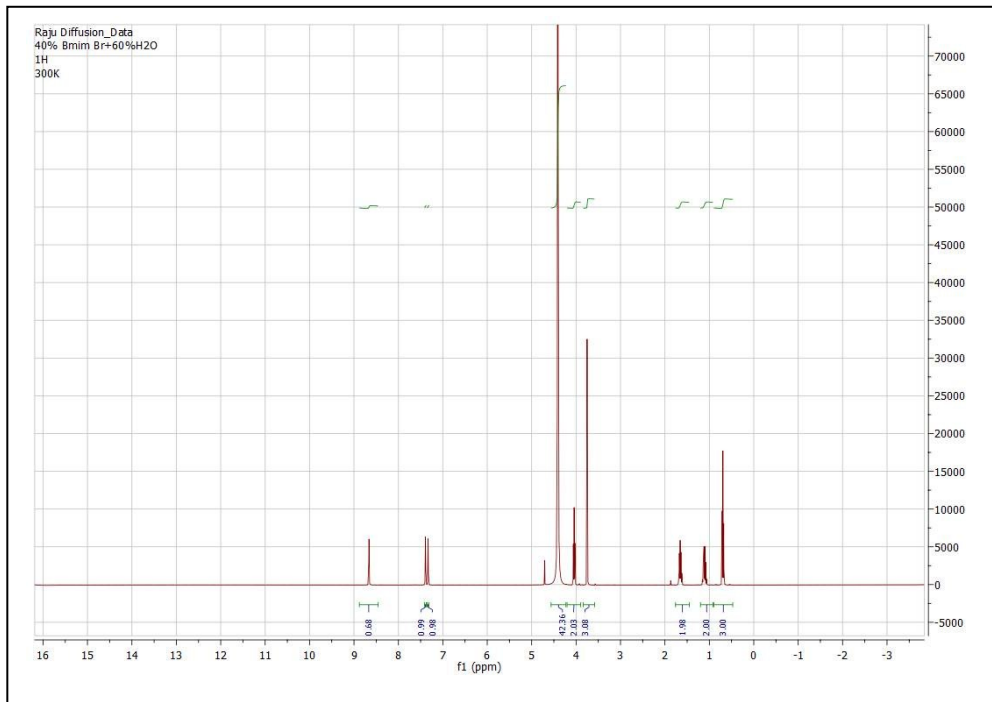



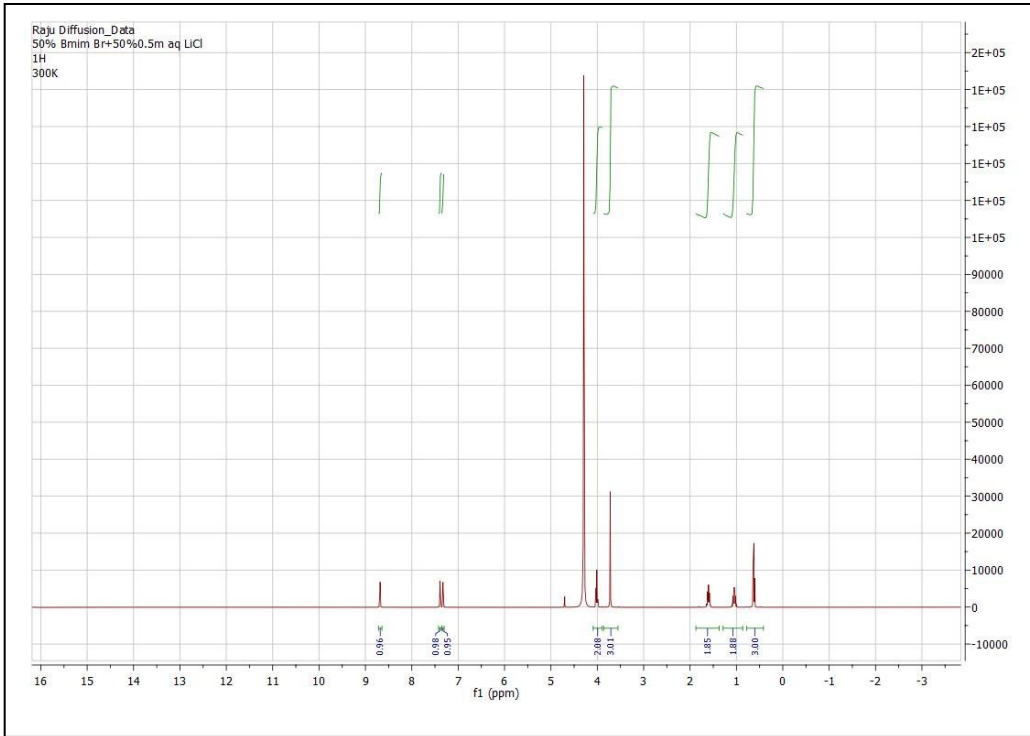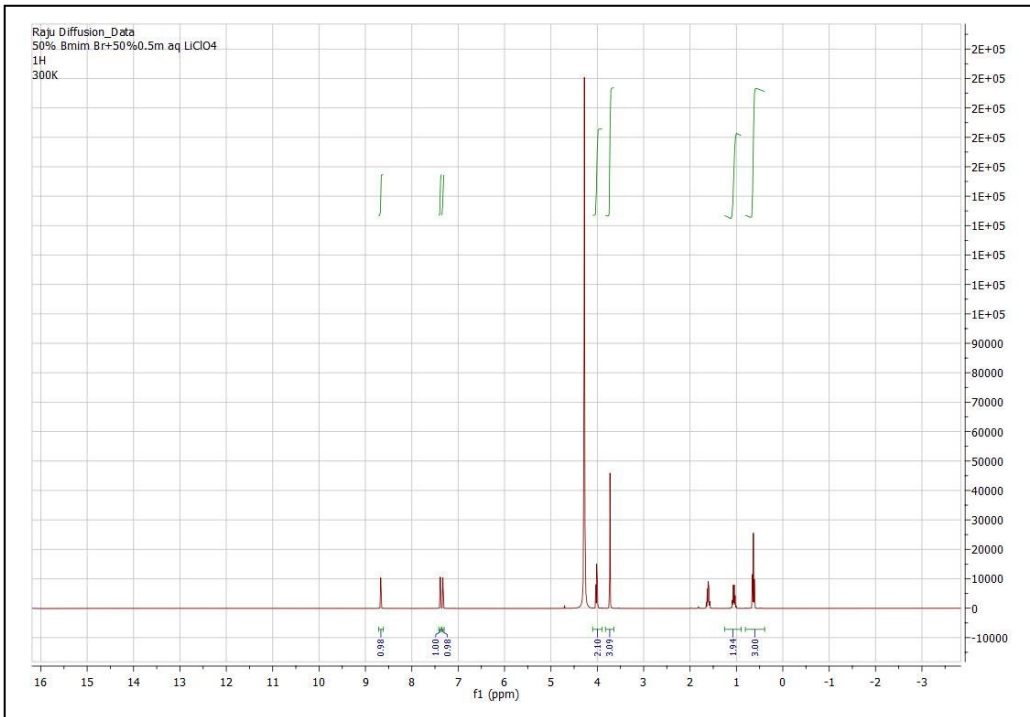

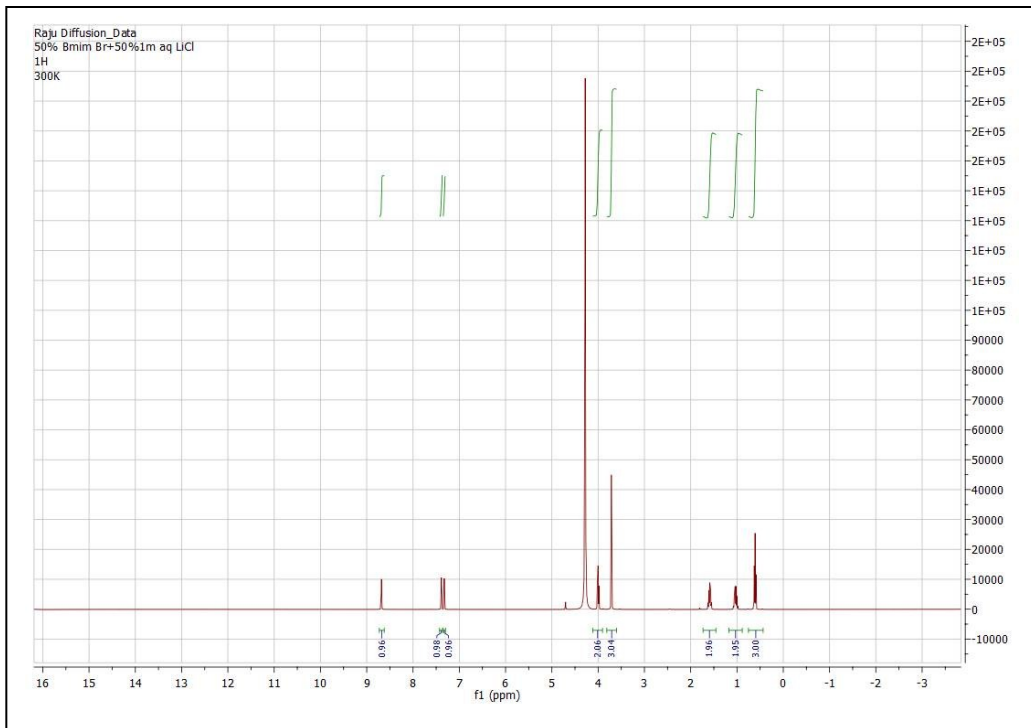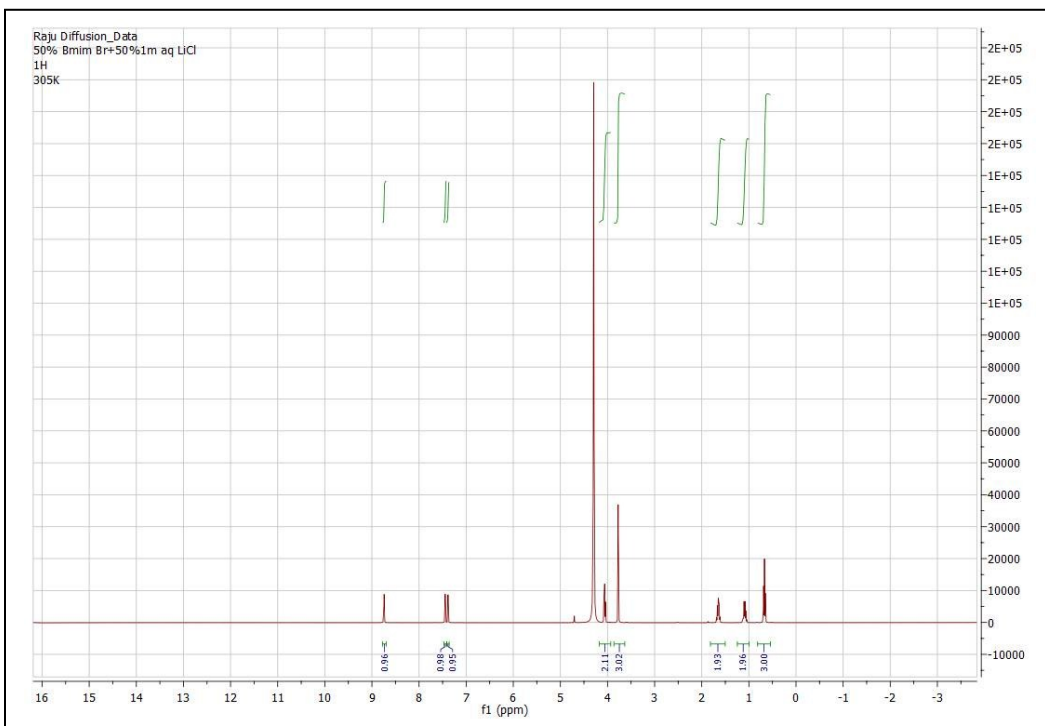

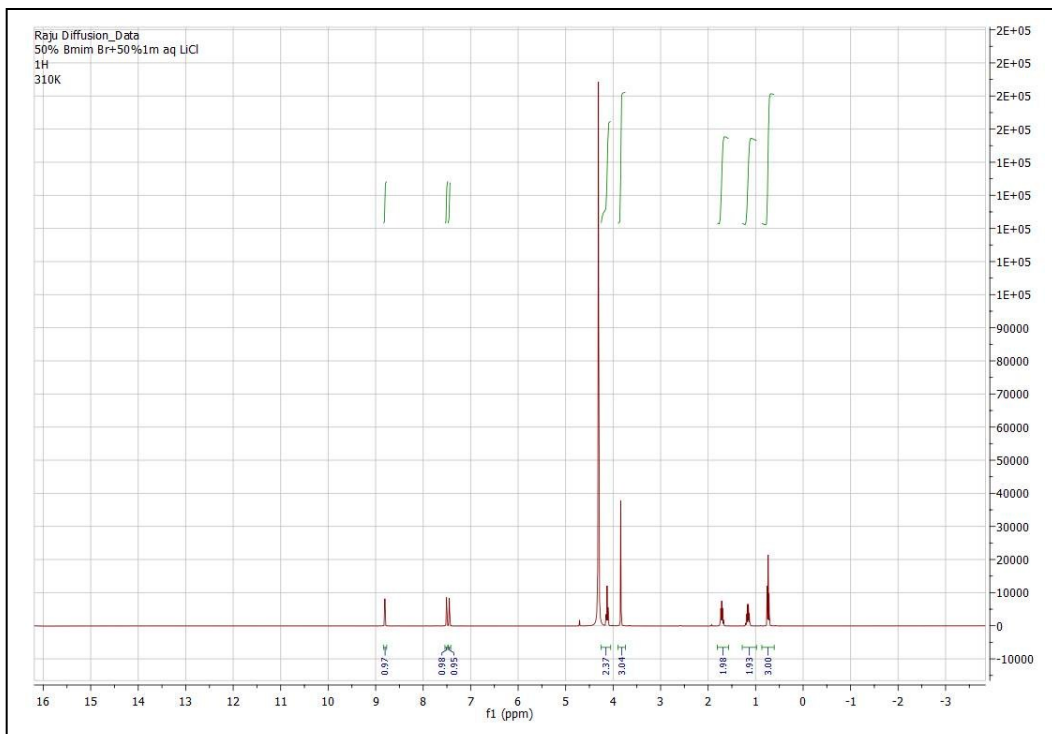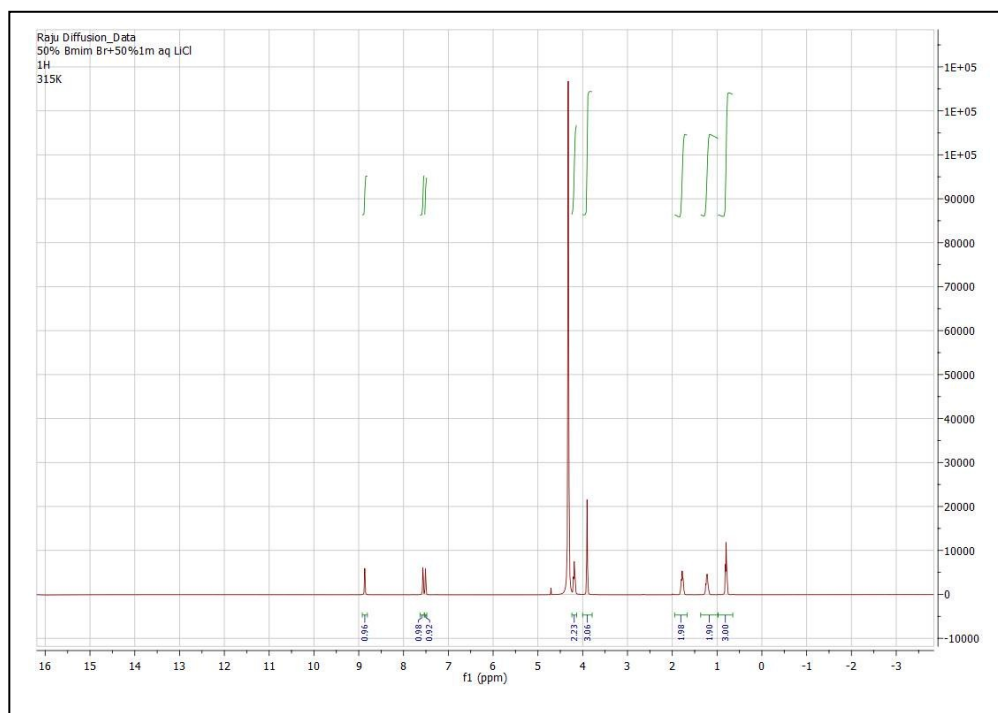

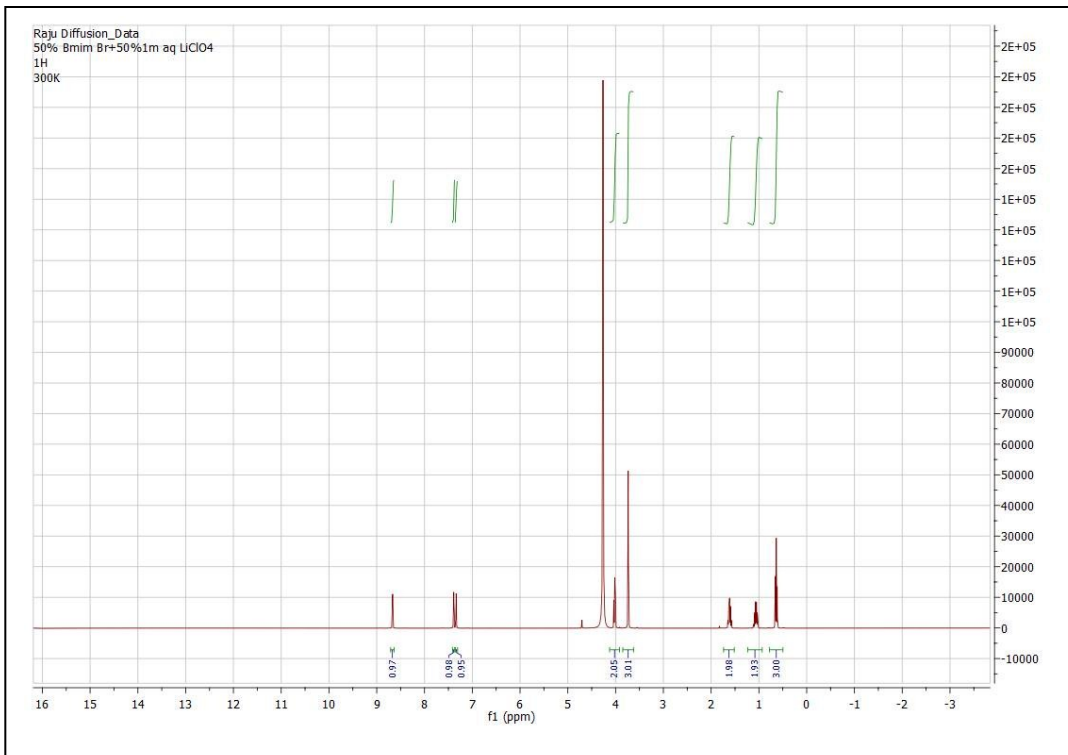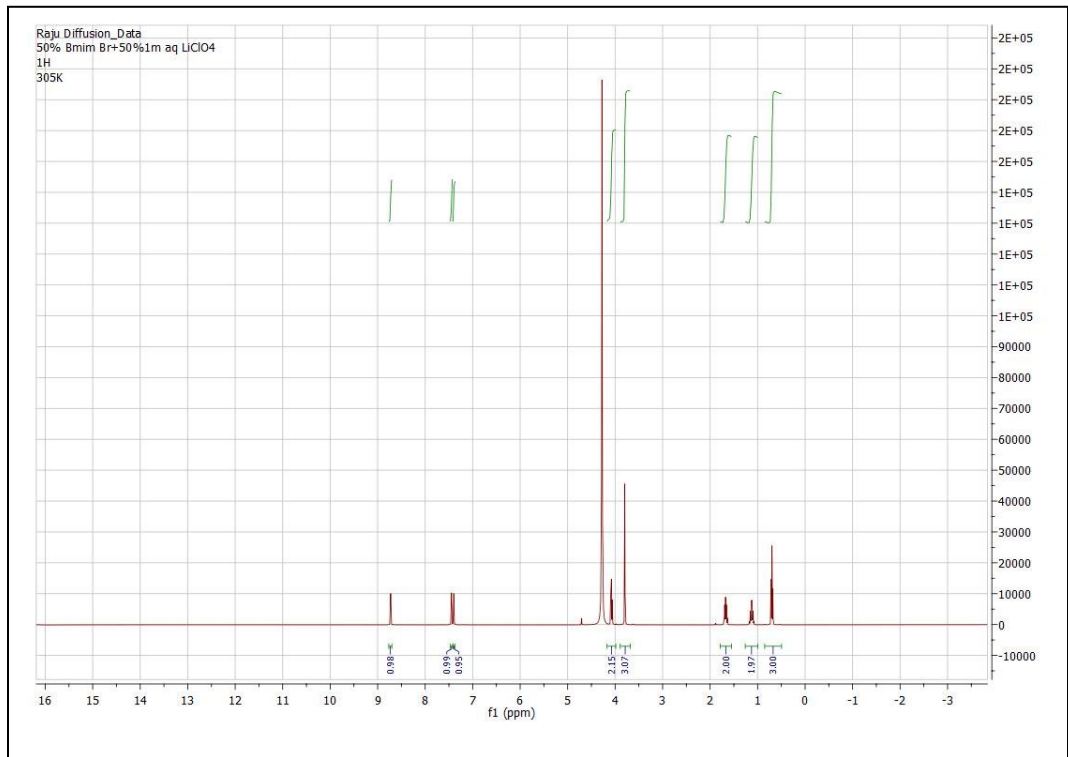

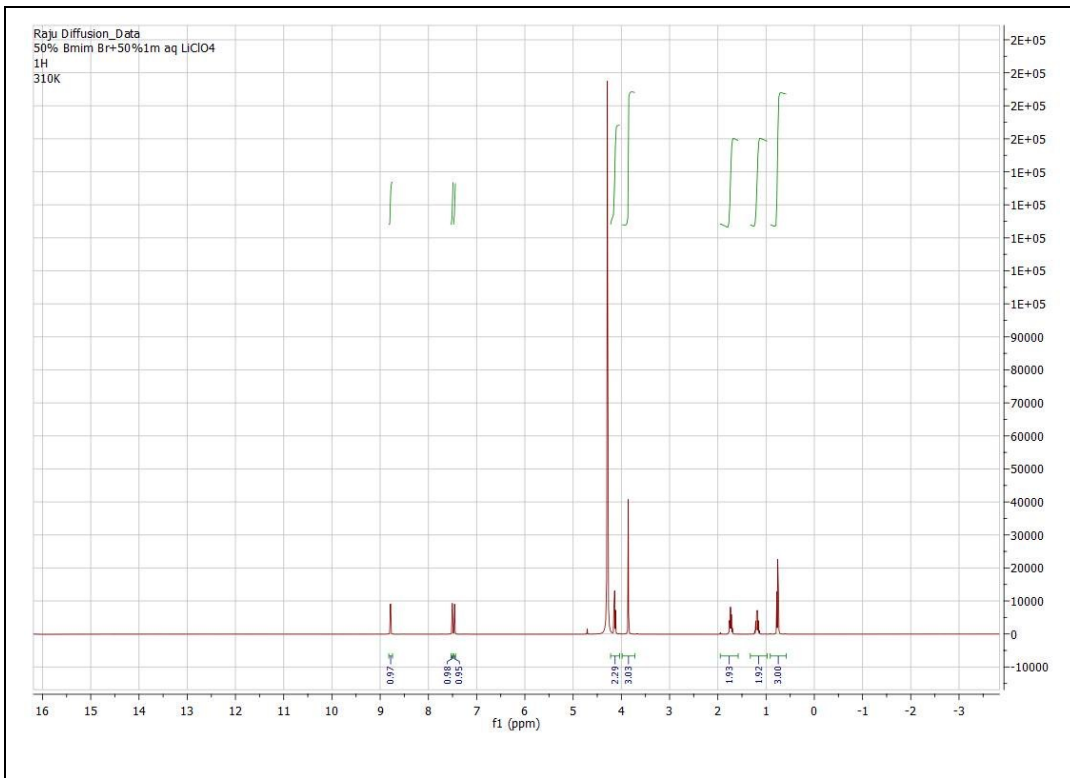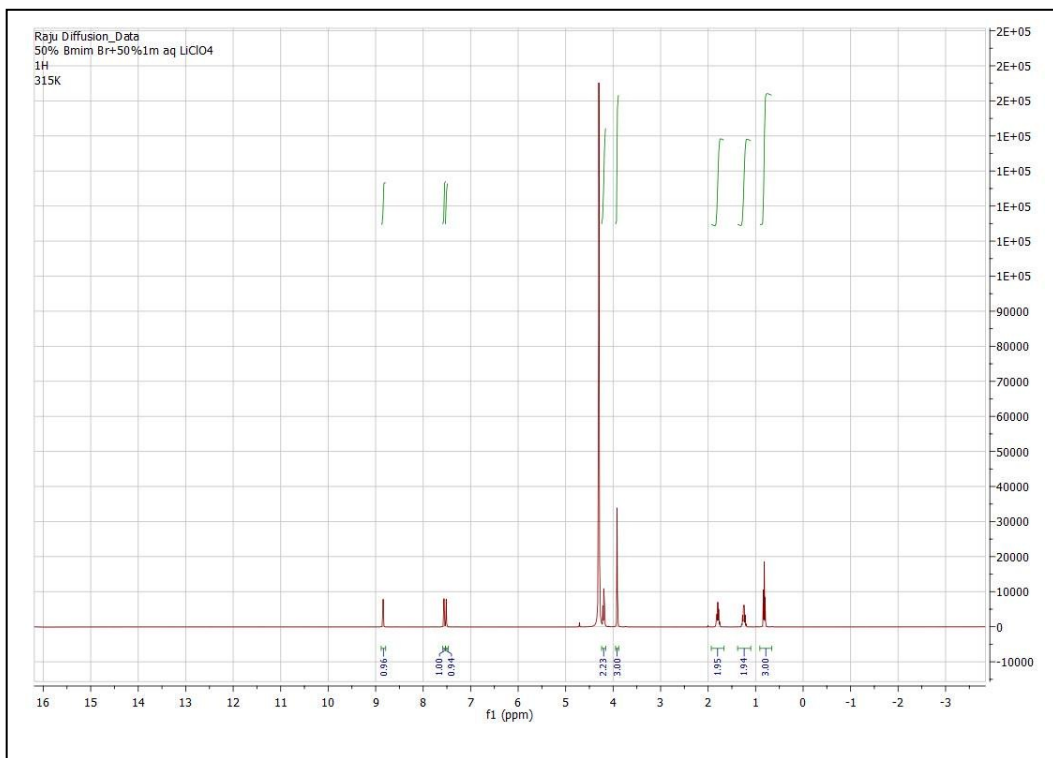

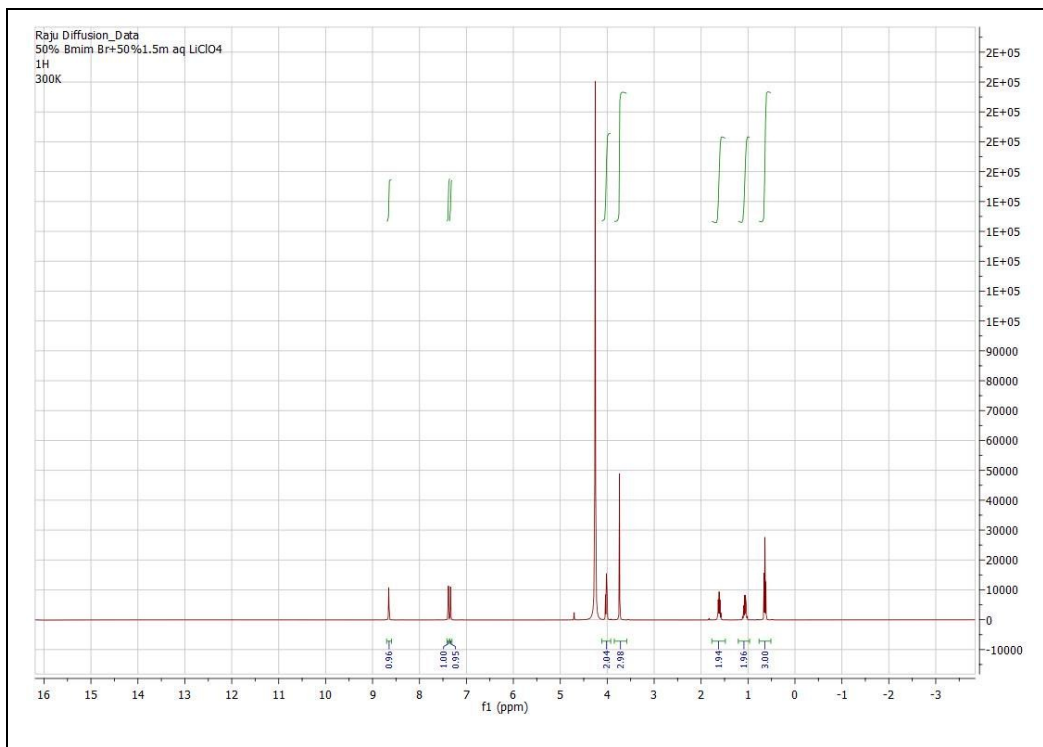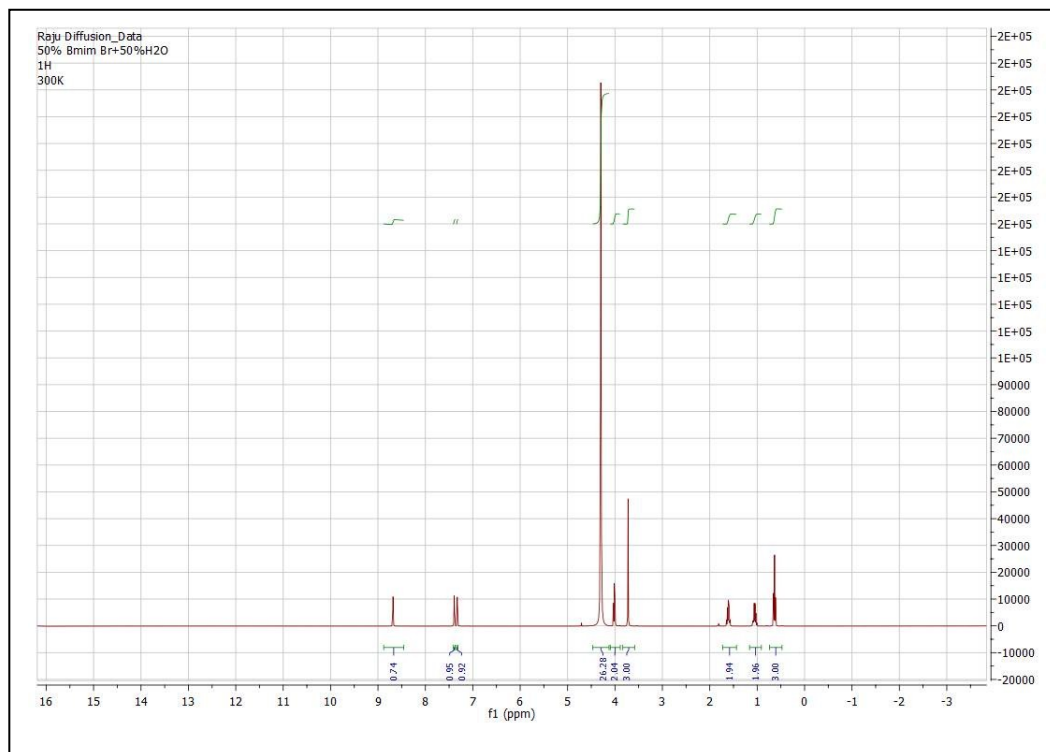

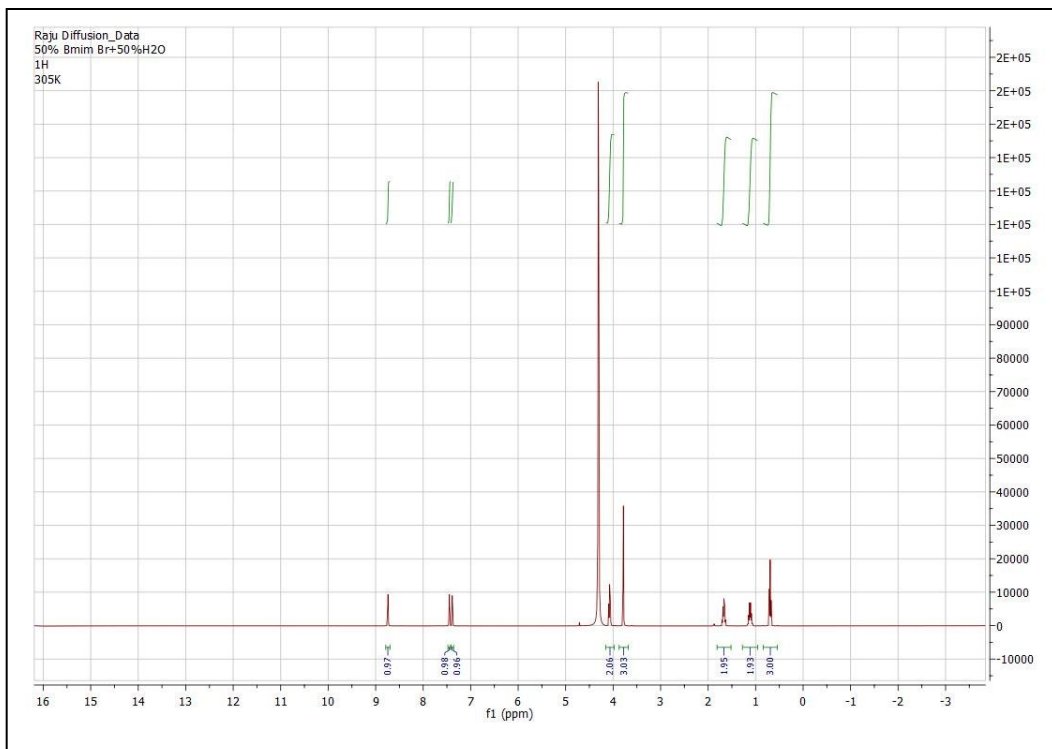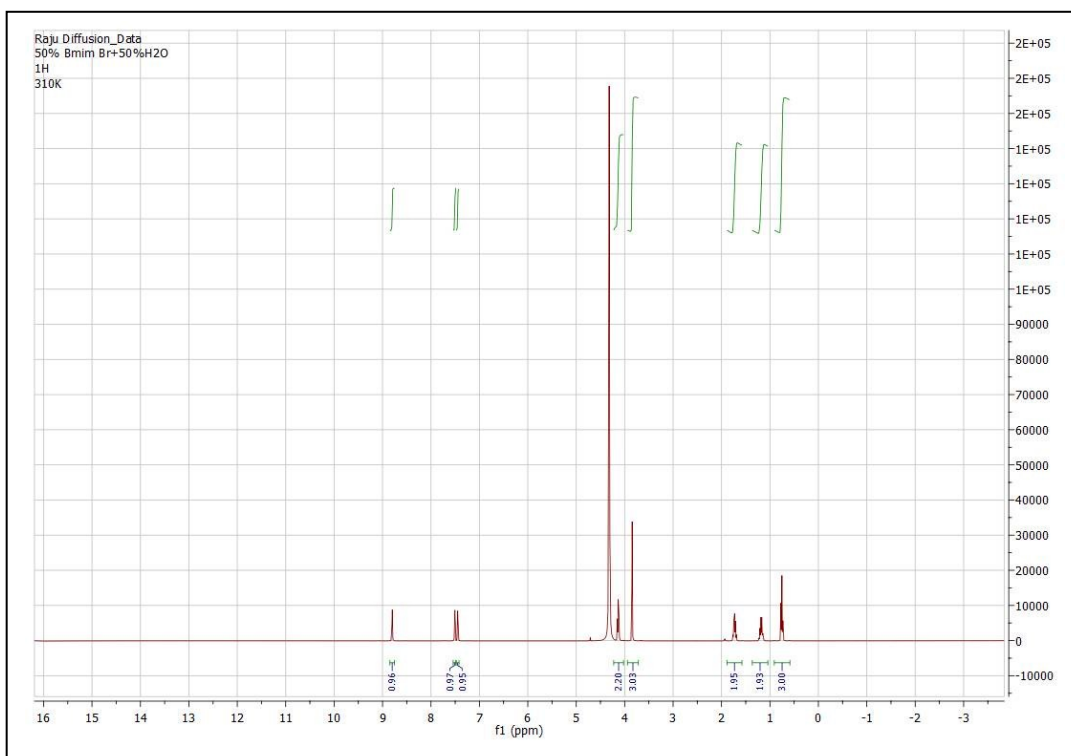

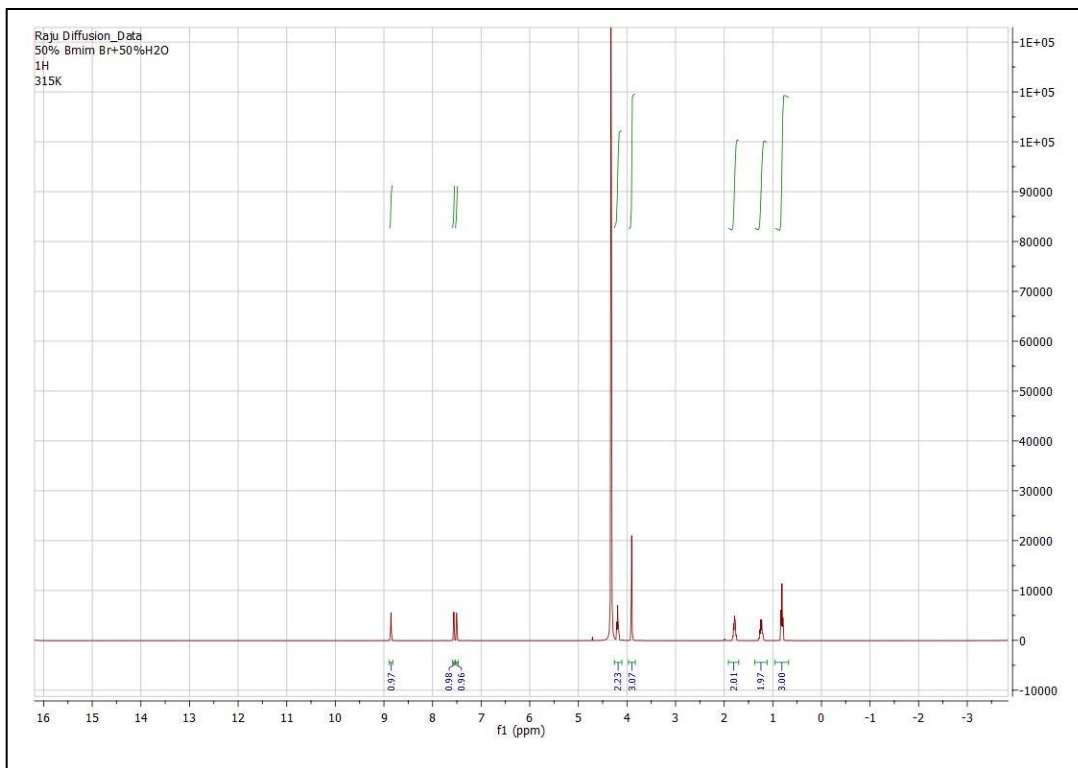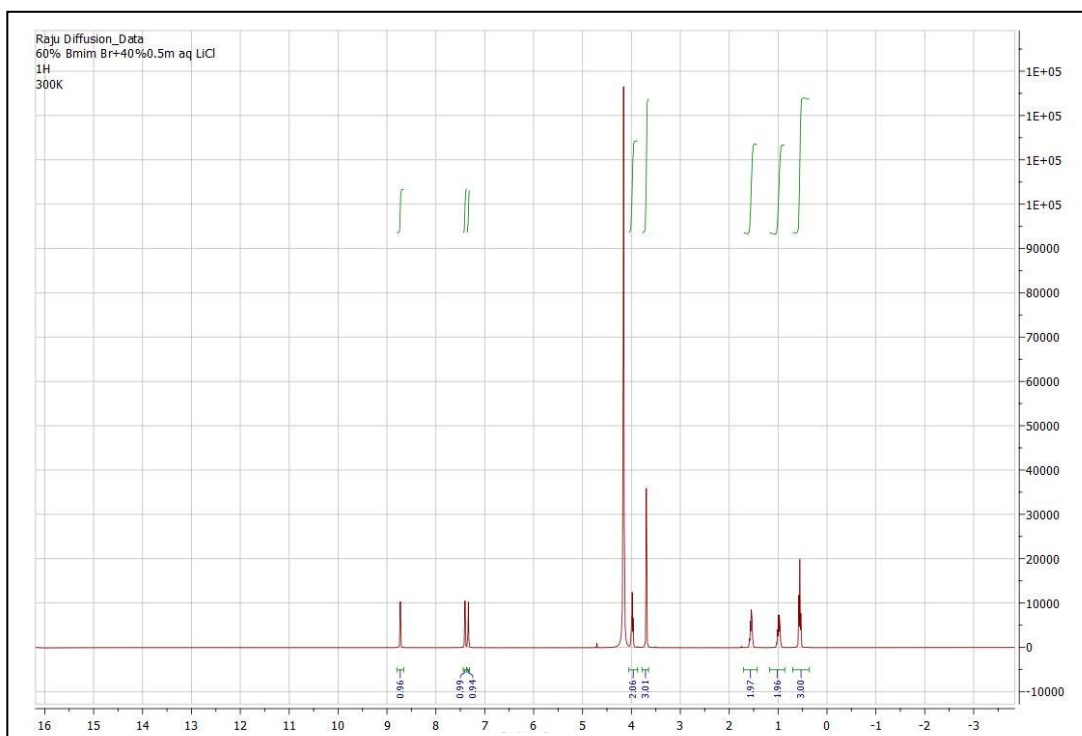



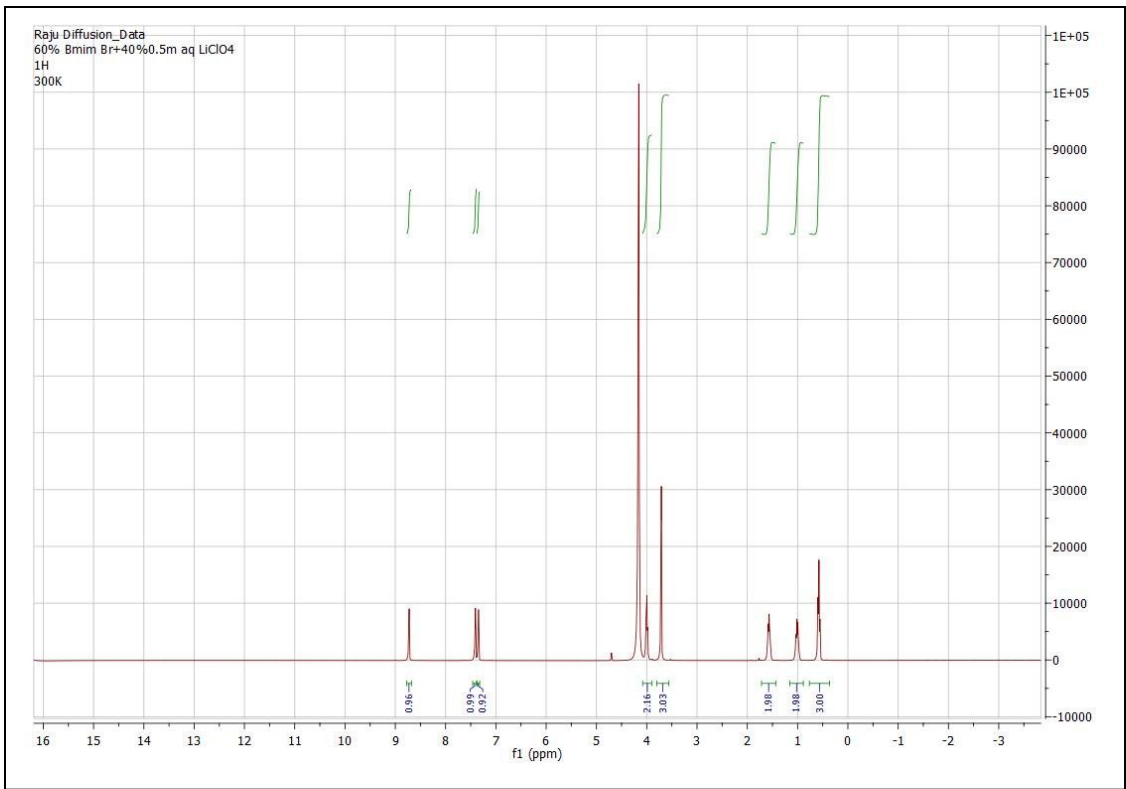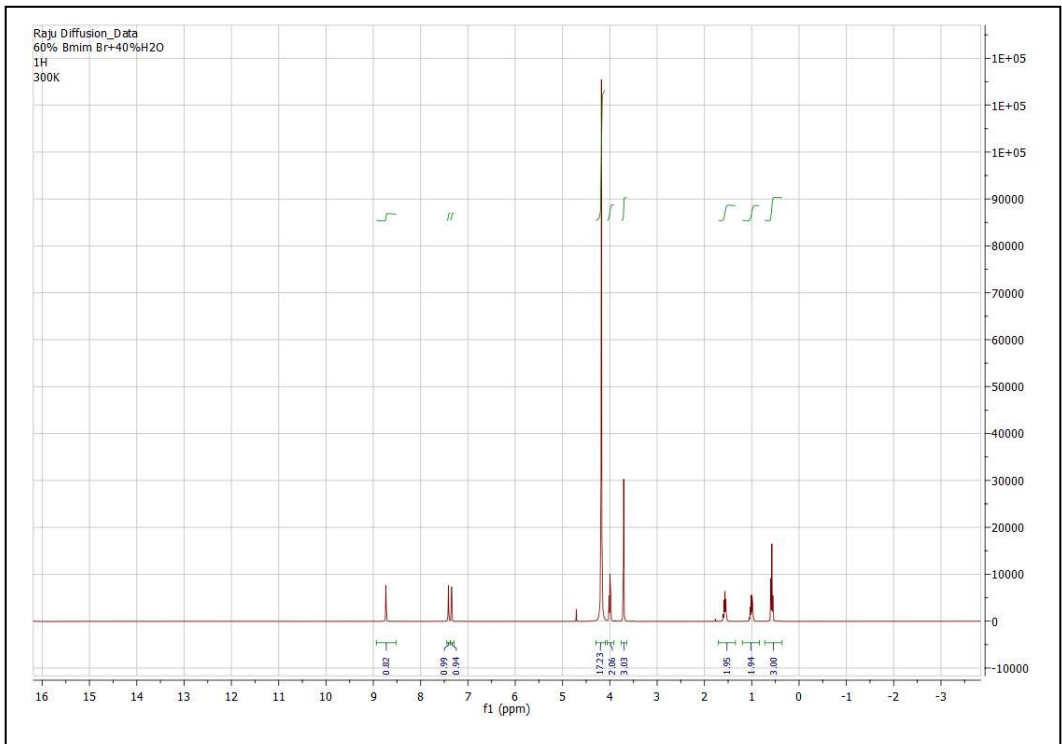

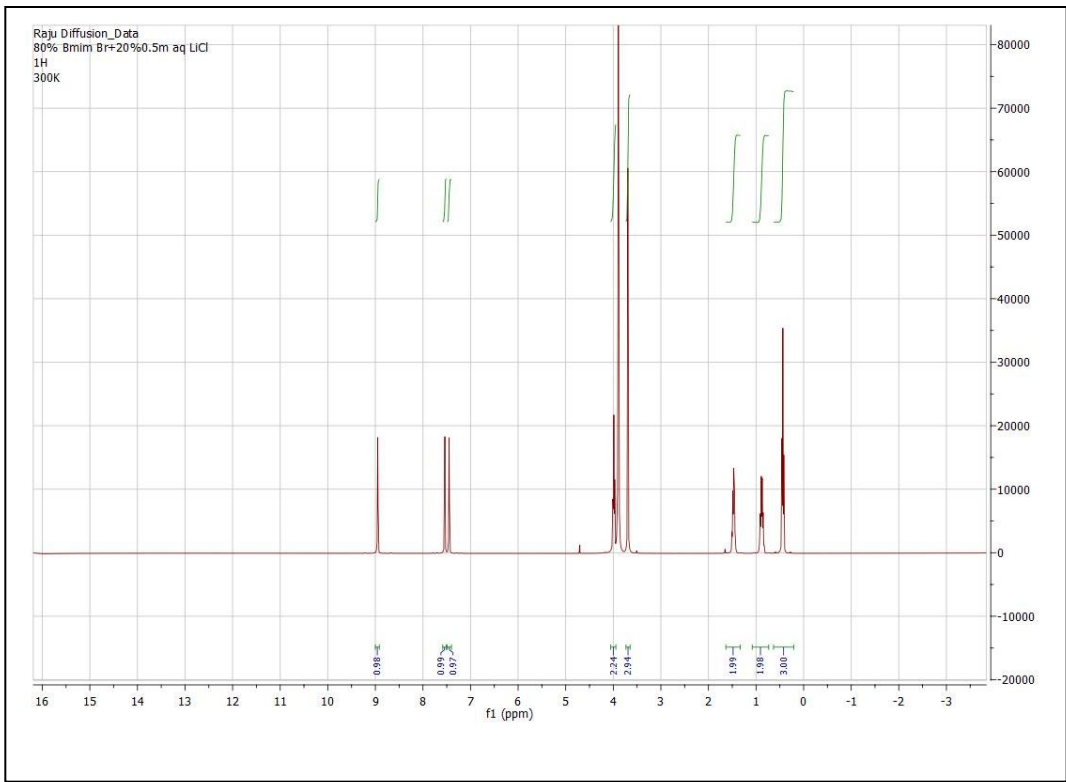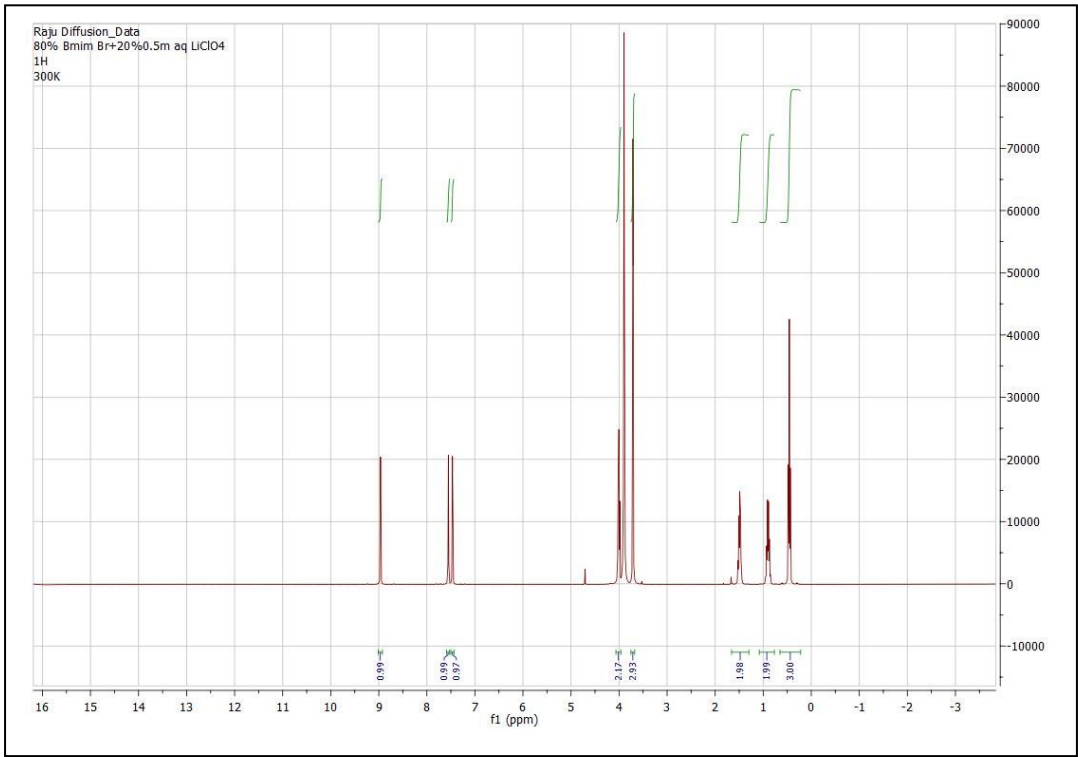

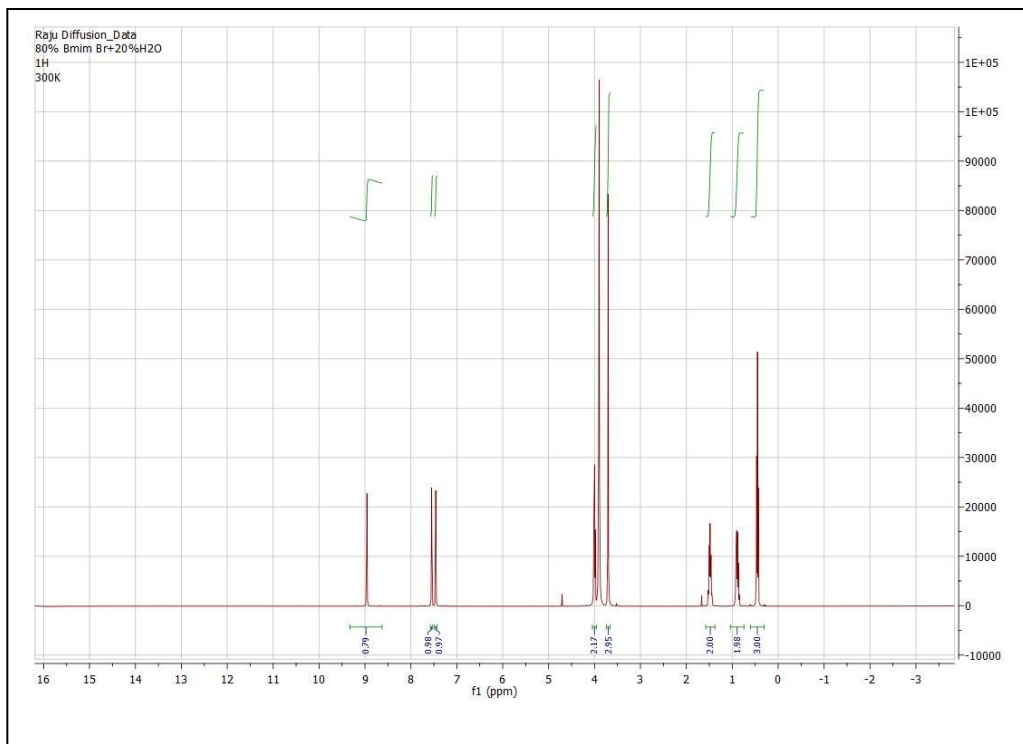

Supplement: c6ra00891g1.pdf [file c6ra00891g1.pdf]
